# Supplementary material for: Morphology of small molecular donor/polymer acceptor blends in organic solar cells: effect of the π–π stacking capability of the small molecular donors
Source: Royal Society of Chemistry journal article supplement (doi:10.1039/c9tc03819a), 2019-01-01
Supplement: c9tc03819a1.pdf [file c9tc03819a1.pdf]

Supporting Information

**Morphology of small molecular donor/polymer acceptor blend in organic solar cells: effect of  $\pi$ - $\pi$  stacking capability of small molecular donors**

Zijian Zhang,<sup>a,c</sup> Zicheng Ding,<sup>a</sup> Junhui Miao,<sup>a,d</sup> Jingming Xin,<sup>b</sup> Wei Ma,<sup>b</sup> Chuandong Dou,<sup>a</sup> Jun Liu <sup>\*a</sup> and Lixiang Wang <sup>a</sup>

<sup>a</sup> State Key Laboratory of Polymer Physics and Chemistry, Changchun Institute of Applied Chemistry, Chinese Academy of Sciences, Changchun, 130022, P. R. China.

E-mail: liujun@ciac.ac.cn

<sup>b</sup> State Key Laboratory for Mechanical Behavior of Materials, Xi'an Jiaotong University, Xi'an 710049, P. R. China.

<sup>c</sup> University of Chinese Academy of Sciences, No.19A Yuquan Road, Beijing 100049, P. R. China.

<sup>d</sup> University of Science and Technology of China, Hefei 230026, P. R. China.

## Experimental section

**Materials.** DR3TBDTT were purchased from Solarmer Materials Inc. DR3TBDTC and P-BNBP-fBT ( $M_n = 116.0$  kDa, PDI = 2.6) were obtained according to the previous reported methods.<sup>1,2</sup>

**Generals.** UV–visible absorption spectra was measured with a Perkin-Elmer Lambda 35 UV-vis spectrometer. AFM characterization was performed on a SPA 300HV with a SPI 3800N controller (Seiko Instruments, Inc., Japan) in tapping mode. A silicon micro cantilever (spring constant  $2 \text{ N m}^{-1}$  and resonance frequency ca. 300 kHz, Olympus Co., Japan) with an etched conical tip was used for the scan. The thickness of films was measured with a XP-plus Stylus Profilometer.

**OSC device fabrication and measurement.** ITO glass substrates were first cleaned in detergent, de-ionized water, acetone and *iso*-propanol alcohol by ultrasonic treatment for 10 min, and then dried at 120 °C for 2 h. After treated with UV-ozone for 25 min, a thin layer (ca. 40 nm) of PEDOT:PSS (Clevios PVP A14083 from H. C. Starck Inc.) was spin-coated on the pre-cleaned ITO glass substrates and then baked at 120 °C for 30 min in air. All the substrates were transferred to a nitrogen-filled glove box. The  $M_D:P_A$  blends with a fixed polymer concentration of  $2.5 \text{ mg mL}^{-1}$  were dissolved in CB in the glove box. The donor:acceptor weight ratios are 4:1 and 3:1 for DR3TBDTT:P-BNBP-fBT and DR3TBDTC:P-BNBP-fBT, respectively. The blends were stirred at 80 °C for 3 hours to ensure the complete dissolution. Before spin coating, both the solutions and ITO/PEDOT:PSS substrates were preheated on a hot plate at 80 °C. The active layers with a thickness of ca. 80–90 nm were obtained by spin coating the warm

solutions onto the preheated substrate. After thermal annealing at 180 °C for 10 min, that, the active layers were transferred into a vacuum chamber. Finally, Ca (20 nm) and Al (100 nm) were sequentially deposited on the top of the active layer at a pressure of  $2 \times 10^{-4}$  Pa. The active area of the devices was 8 mm<sup>2</sup>. The  $J-V$  plots were measured using a Keithley 2400 source meter under 100 mW cm<sup>-2</sup> AM 1.5G simulated solar light illumination provided by a XES-40S2-CE Class Solar Simulator (Japan, SAN-EI Electric Co., Ltd.). The EQE curves were measured using a Solar Cell Spectral Response Measurement System QE-R3011 (Enlitech Co., Ltd.) under the short-circuit condition at a chopping frequency of 165 Hz.

**GIWAXS Characterization.** GIWAXS measurements were performed at beamline 7.3.3 at the Advanced Light Source.<sup>3</sup> The pure DR3TBDTT, DR3TBDTC and P-BNBP-fBT films were prepared from their CB solutions on Si substrate. Both the solutions and Si substrates were preheated at 80 °C. DR3TBDTT:P-BNBP-fBT and DR3TBDTC:P-BNBP-fBT blend films were prepared using identical blend solutions as those used in devices. The 10 keV X-ray beam was incident at a grazing angle of 0.12°–0.16°, which maximized the scattering intensity from the samples. The scattered X-rays were detected using a Dectris Pilatus 1M photon counting detector.

**R-SoXS characterization.** R-SoXS transmission measurements were performed at beamline 11.0.1.2 at the Advanced Light Source (ALS).<sup>4</sup> A 285.2 eV beamline energy was chosen to enhance the contrast. Samples for R-SoXS measurements were prepared on a PEDOT:PSS modified Si substrate under the same conditions as those used for device fabrication, and then transferred by floating in water to a 1.5 mm × 1.5 mm, 100

nm thick Si<sub>3</sub>N<sub>4</sub> membrane supported by a 5 mm × 5 mm, 200 μm thick Si frame (Norcada Inc.). 2-D scattering patterns were collected on an in-vacuum CCD camera (Princeton Instrument PI-MTE). The sample detector distance was calibrated from diffraction peaks of a triblock copolymer poly(isoprene-b-styrene-b-2-vinyl pyridine), which has a known spacing of 391 Å. The beam size at the sample is approximately 100 μm by 200 μm.

**Hole- and electron-only devices fabrication and mobility measurements.** The hole and electron mobilities were measured by the space-charge-limited current (SCLC) method. The hole-only device structure is ITO/PEDOT:PSS (40 nm)/active layer/MoO<sub>3</sub> (10 nm)/Al (100 nm) and the electron-only device structure is ITO/PEIE (10 nm)/active layer/Ca (20 nm) /Al (100 nm), respectively.  $J$ - $V$  plots in the range of 0–10 V were measured using a Keithley 2400 source meter, and the mobility was obtained by fitting the  $J$ - $V$  plots near quadratic region according to the modified Mott–Gurney equation:<sup>5</sup>

$$J = \frac{9}{8} \epsilon_r \epsilon_0 \mu \frac{V^2}{L^3} \exp\left(0.89\beta \frac{\sqrt{V}}{\sqrt{L}}\right)$$

Where  $J$  is the current density,  $\epsilon_0$  is permittivity of free space,  $\epsilon_r$  is the relative permittivity (assumed to be 3),  $\mu$  is the zero-field mobility,  $V$  is the potential across the device ( $V = V_{\text{applied}} - V_{\text{bi}} - V_{\text{series}}$ ),  $L$  is the thickness of active layer, and  $\beta$  is the field-activation factor. The series and contact resistance of the device (10–20 Ω) were measured using blank device of ITO/PEDOT:PSS/MoO<sub>3</sub>/Al or ITO/PEIE/Ca/Al.

**Table S1** GIWAXS characterization data of the as-cast and thermal annealed pure DR3TBDTT, DR3TBDTC, P-BNBP-fBT films.

| Films      | Conditions | 100                         |                       |                         |        | 010                         |                       |                         |        |
|------------|------------|-----------------------------|-----------------------|-------------------------|--------|-----------------------------|-----------------------|-------------------------|--------|
|            |            | Location (Å <sup>-1</sup> ) | <i>d</i> -spacing (Å) | FWHM (Å <sup>-1</sup> ) | CL (Å) | Location (Å <sup>-1</sup> ) | <i>d</i> -spacing (Å) | FWHM (Å <sup>-1</sup> ) | CL (Å) |
| DR3TBDTT   | As-cast    | 0.30                        | 20.86                 | 0.02                    | 336.21 | 1.72                        | 3.66                  | 0.08                    | 73.63  |
|            | Annealed   | 0.30                        | 20.95                 | 0.02                    | 327.18 | 1.72                        | 3.65                  | 0.09                    | 64.09  |
| DR3TBDTC   | As-cast*   | 0.31                        | 20.57                 | 0.04                    | 133.71 | 1.68                        | 3.74                  | 0.16                    | 35.36  |
|            | Annealed*  | 0.30                        | 21.18                 | 0.03                    | 214.42 | 1.66                        | 3.77                  | 0.10                    | 58.27  |
| P-BNBP-fBT | As-cast    | 0.29                        | 21.43                 | 0.10                    | 58.46  | 1.57                        | 4.01                  | 0.39                    | 14.67  |
|            | Annealed   | 0.28                        | 22.25                 | 0.06                    | 87.99  | 1.63                        | 3.84                  | 0.29                    | 19.59  |

(100) data are from in-plane line-cuts; (010) data are from out-of-plane line-cuts.

\* (100) data are from out-of-plane line-cuts; \* (010) data are from in-plane line-cuts.

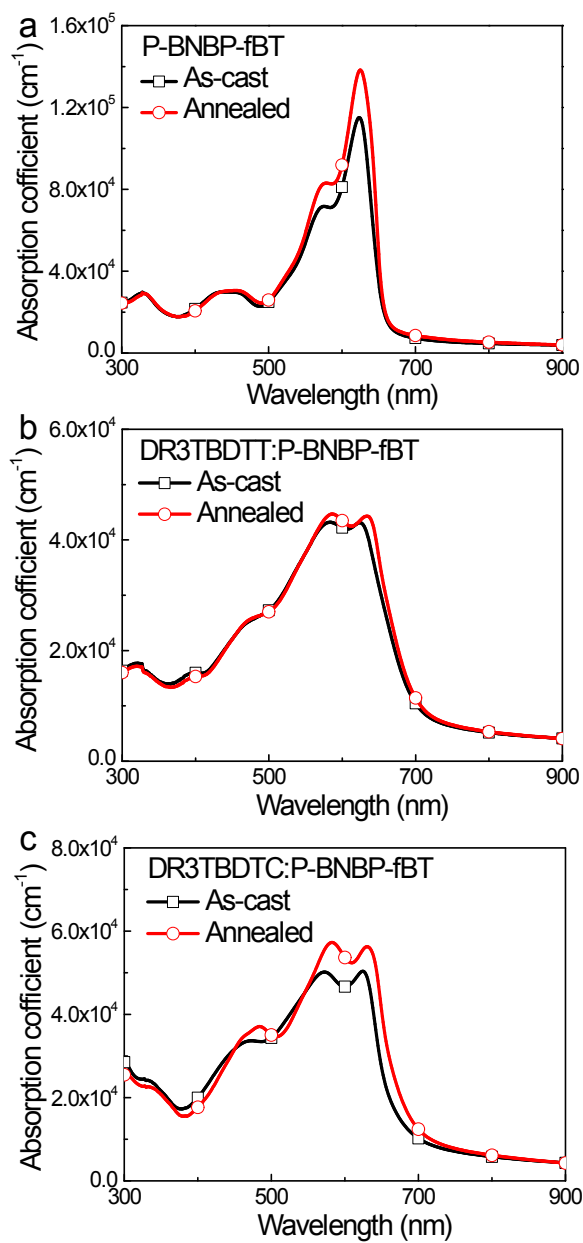

**Fig. S1** Absorption spectra of the as-cast and thermal annealed pure P-BNBP-fBT, DR3TBDTT:P-BNBP-fBT and DR3TBDTC:P-BNBP-fBT blend films.

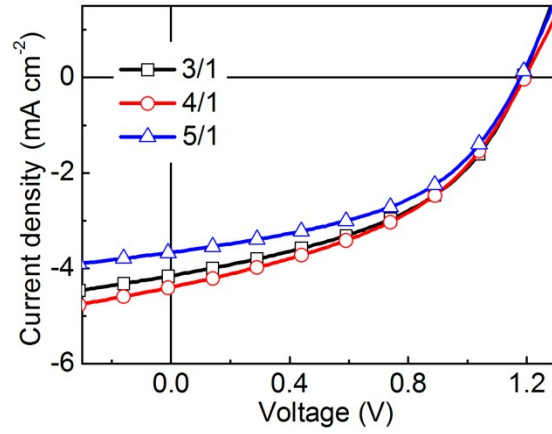

**Fig. S2**  $J$ - $V$  plots of OSCs based on the as-cast DR3TBDTT:P-BNBP-fBT blend films with different weight ratios.

**Table S2** Photovoltaic performance parameters of OSCs based on the as-cast DR3TBDTT:P-BNBP-fBT blend films with different weight ratios.

| D/A ratio (w/w) | $V_{oc}$ (V) | $J_{sc}$ (mA cm <sup>-2</sup> ) | FF (%) | PCE (%) |
|-----------------|--------------|---------------------------------|--------|---------|
| 3/1             | 1.19         | 4.16                            | 45.2   | 2.24    |
| 4/1             | 1.19         | 4.39                            | 43.4   | 2.27    |
| 5/1             | 1.18         | 3.67                            | 47.3   | 2.05    |

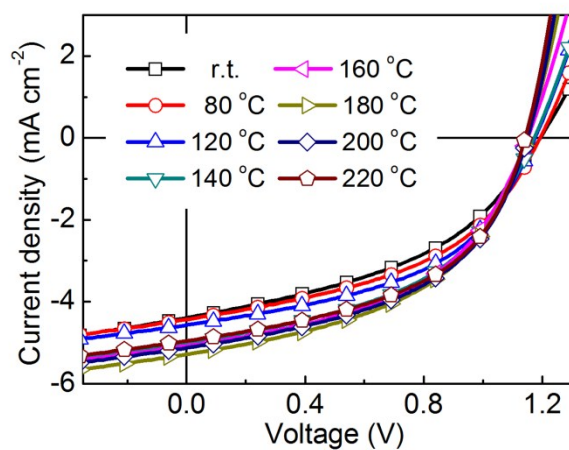

**Fig. S3**  $J$ - $V$  plots of OSCs based on DR3TBDTT:P-BNBP-fBT blend (4:1, w/w) films annealed at different temperatures.

**Table S3** Photovoltaic performance parameters of OSCs based on the DR3TBDTT:P-BNBP-fBT blend (4:1, w/w) films thermal annealed at different temperatures.

| Temperature (°C) | $V_{oc}$ (V) | $J_{sc}$ (mA cm <sup>-2</sup> ) | FF (%) | PCE (%) |
|------------------|--------------|---------------------------------|--------|---------|
| r.t.             | 1.19         | 4.39                            | 43.4   | 2.27    |
| 80               | 1.19         | 4.43                            | 46.0   | 2.43    |
| 120              | 1.18         | 4.57                            | 47.9   | 2.58    |
| 140              | 1.17         | 5.00                            | 47.1   | 2.75    |
| 160              | 1.15         | 5.08                            | 47.9   | 2.80    |
| 180              | 1.15         | 5.28                            | 48.0   | 2.91    |
| 200              | 1.15         | 5.13                            | 48.8   | 2.88    |
| 220              | 1.14         | 4.96                            | 49.6   | 2.80    |



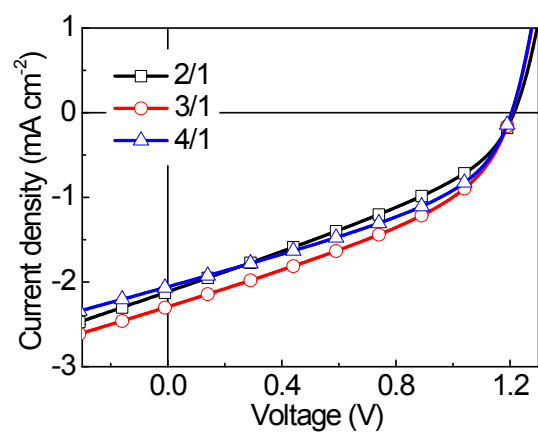

**Fig. S4**  $J$ - $V$  plots of OSCs based on the as-cast DR3TBDTC:P-BNBP-fBT blend films with different weight ratios.

**Table S4** Photovoltaic performance parameters of OSCs based on the as-cast DR3TBDTC:P-BNBP-fBT blend films with different weight ratios.

| D/A ratio (w/w) | $V_{oc}$ (V) | $J_{sc}$ (mA cm <sup>-2</sup> ) | FF (%) | PCE (%) |
|-----------------|--------------|---------------------------------|--------|---------|
| 2/1             | 1.21         | 2.12                            | 35.0   | 0.90    |
| 3/1             | 1.21         | 2.22                            | 39.2   | 1.09    |
| 4/1             | 1.20         | 2.00                            | 40.2   | 0.99    |

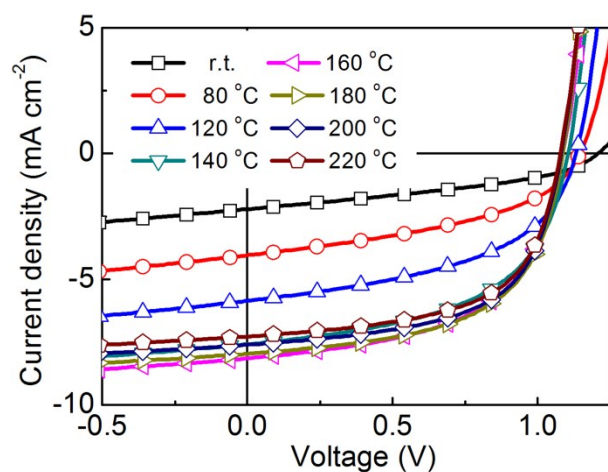

**Fig. S5**  $J$ - $V$  plots of OSCs based on DR3TBDTC:P-BNBP-fBT blend (3:1, w/w) films annealed at different temperatures.

**Table S5** Photovoltaic performance parameters of OSCs based on the DR3TBDTC:P-BNBP-fBT blend (3:1, w/w) films thermal annealed at different temperatures.

| Temperature (°C) | $V_{oc}$ (V) | $J_{sc}$ (mA cm <sup>-2</sup> ) | FF (%) | PCE (%) |
|------------------|--------------|---------------------------------|--------|---------|
| r.t.             | 1.21         | 2.22                            | 39.2   | 1.09    |
| 80               | 1.14         | 4.05                            | 44.4   | 2.05    |
| 120              | 1.13         | 5.86                            | 49.5   | 3.28    |
| 140              | 1.10         | 7.58                            | 54.3   | 4.53    |
| 160              | 1.09         | 8.14                            | 55.7   | 4.94    |
| 180              | 1.09         | 8.60                            | 57.2   | 5.36    |
| 200              | 1.08         | 7.61                            | 59.5   | 4.89    |
| 220              | 1.08         | 7.28                            | 59.4   | 4.67    |

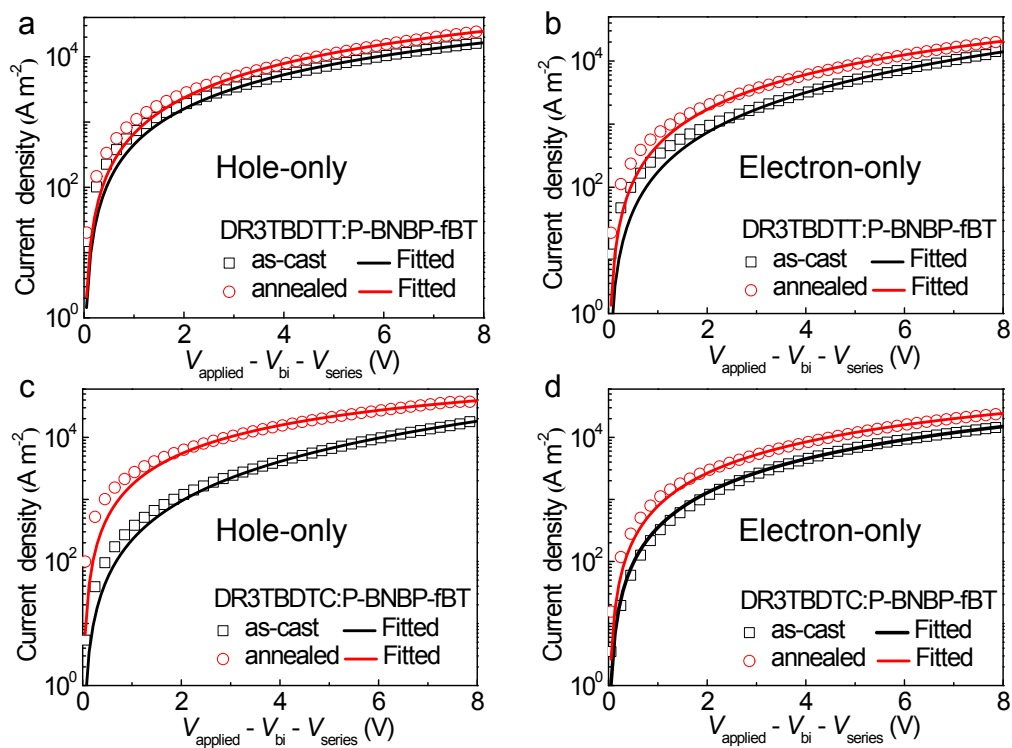

**Fig. S6** Space-charge-limited  $J$ - $V$  plots for (a, c) hole-only and (b, d) electron-only devices of the as-cast and thermal annealed DR3TBDTT:P-BNBP-fBT and DR3TBDTC:P-BNBP-fBT blend films.

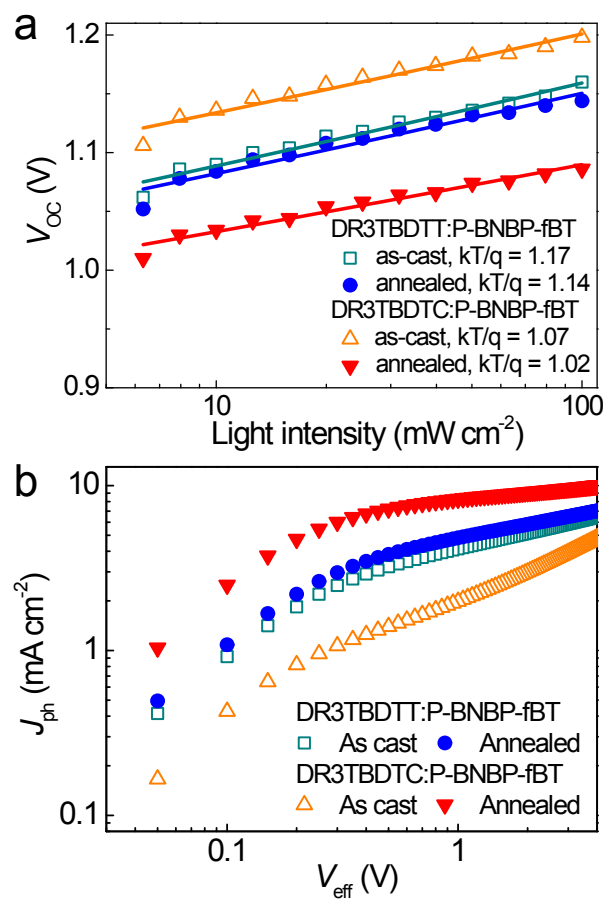

**Fig. S7** (a) Light intensity dependence of  $V_{OC}$  (solid lines are the fitting lines of the data), (b)  $J_{ph}$  versus  $V_{eff}$  plots of the OSC devices based on the as-cast and thermal annealed DR3TBDTT:P-BNBP-fBT and DR3TBDTC:P-BNBP-fBT blend films.

## References

1. Z. Zhang, J. Miao, Z. Ding, B. Kan, B. Lin, X. Wan, W. Ma, Y. Chen, X. Long, C. Dou, J. Zhang, J. Liu and L. Wang, *Nat. Commun.*, 2019, **10**, 3271.
2. X. Long, Z. Ding, C. Dou, J. Zhang, J. Liu and L. Wang, *Adv. Mater.*, 2016, **28**, 6504–6508.
3. A. Hexemer, W. Bras, J. Glossinger, E. Schaible, E. Gann, R. Kirian, A. MacDowell, M. Church, B. Rude and H. Padmore, *J. Phys.: Conf. Ser.*, 2010, **247**, 012007.
4. E. Gann, A. Young, B. Collins, H. Yan, J. Nasiatka, H. Padmore, H. Ade, A. Hexemer and C. Wang, *Rev. Sci. Instrum.*, 2012, **83**, 045110.
5. Y. Hwang, T. Earmme, B. Courtright, F. Eberle and S. Jenekhe, *J. Am. Chem. Soc.*, 2015, **137**, 4424–4434.
